# Supplementary material for: Long noncoding RNA HCP5 participates in premature ovarian insufficiency by transcriptionally regulating MSH5 and DNA damage repair via YB1
Source: PubMed Central journal article supplement — Nucleic Acids Res. 2020 Feb 29;48(8):4480–91. doi: 10.1093/nar/gkaa127 (PMC7192606; doi:10.1093/nar/gkaa127), 2020-02-29
Supplement: gkaa127_supplemental_file.pdf [file gkaa127_supplemental_file.pdf]

Supplementary Table S1. Primers used in this study

| Gene<br>(homo sapiens) | Forward (5'-3')                          | Reverse (5'-3')                             | Application                      |
|------------------------|------------------------------------------|---------------------------------------------|----------------------------------|
| HCP5                   | TCTCCTTCTGCCCATCACTTG                    | AACCCTCCTCCTGCTGTTCTC                       | qRT-PCR                          |
| GAPDH                  | GGGAAACTGTGGCGTGAT                       | GAGTGGGTGTCGCTGTTGA                         | qRT-PCR                          |
| LMNB1(LaminB1)         | GAAAAAGACAACCTCTCGTCGCA                  | GTAAGCACTGATTTCCATGTCCA                     | qRT-PCR                          |
| MSH5                   | TCCAGCTCTTTCGGGACATT                     | AGGACTTGTGGGGAGTAACG                        | qRT-PCR                          |
| YBX1(YB1)              | GGACAAGAAGGTCATCGCAAC                    | TCTCCATCTCCTACACTGCGA                       | qRT-PCR                          |
| ILF2                   | GGGGAACAAAGTCGTGGAAAG                    | CCAGTTTCGTTGGTCAGCA                         | qRT-PCR                          |
| MSH5 promoter          | TTTCTTTCTCCCTCATAACCCCA<br>C             | AAGTAAGACCTAAATGAGCGGT<br>GT                | ChIP-qPCR                        |
| HCP5 Sense             | GGGAAGCTTACTATAGAATATT<br>AAATTCC (XhoI) | GGCCTCGAGCTCAGATTCTCCC<br>CAGACGC (HindIII) | <i>in vitro</i><br>transcription |
| HCP5 Antisense         | GGGAAGCTTCTCAGATTCTCCC<br>CAGACGC (XhoI) | GGCCTCGAGACTATAGAATATT<br>AAATTCC (HindIII) | <i>in vitro</i><br>transcription |

Supplementary Table S2. SiRNA used in this study

| siRNAs         | Sense (5'-3')         |
|----------------|-----------------------|
| siRNA-MSH5 Mix | CCUCUUCCUCUCUUCCAUUTT |
|                | CCUCACAGUUCGAGCACUUTT |
|                | CCUGGGCUUUAAGAAAUUUTT |
| siRNA-ILF2#1   | CUUUGUACCACAUAUCCCATT |
| siRNA-ILF2#2   | GAACUCCAUUUGGAUAUCATT |

Supplementary Table S3. Antibodies used in this study

| Antibody                       | Supplier                  | Catalog#    | Application |
|--------------------------------|---------------------------|-------------|-------------|
| MSH5                           | Abcam                     | ab130484    | WB          |
| Phospho-Histone H2A.X (Ser139) | Cell Signaling Technology | 9718S       | WB/IF       |
| PARP (Cleaved Asp214, Asp215)  | Invitrogen                | 44-698G     | WB          |
| YB1                            | Cell Signaling Technology | 4202        | WB/IF       |
| Lamin B1                       | Abcam                     | ab133741    | WB          |
| ILF2/NF45                      | Santa Cruz                | sc-365068   | WB          |
| Phospho-YB1 (Ser102)           | Cell Signaling Technology | 2900S       | WB          |
| GAPDH                          | Proteintech               | 60004-1-Ig  | WB          |
| $\alpha$ -Tubulin              | Proteintech               | 66031-1-Ig  | WB          |
| $\beta$ -Actin                 | Proteintech               | 66009-1-Ig  | WB          |
| YB1                            | Abcam                     | Ab76149     | ChIP/RIP    |
| RNA polymerase II              | Sigma-Aldrich             | 05-623-25UG | ChIP        |
| ILF2                           | Abcam                     | ab154791    | RIP         |
| YB1                            | Abcam                     | Ab12148     | coIP        |
| Fibrillarin (FBL)              | Abcam                     | ab4566      | IF          |

## Supplementary Figure S1

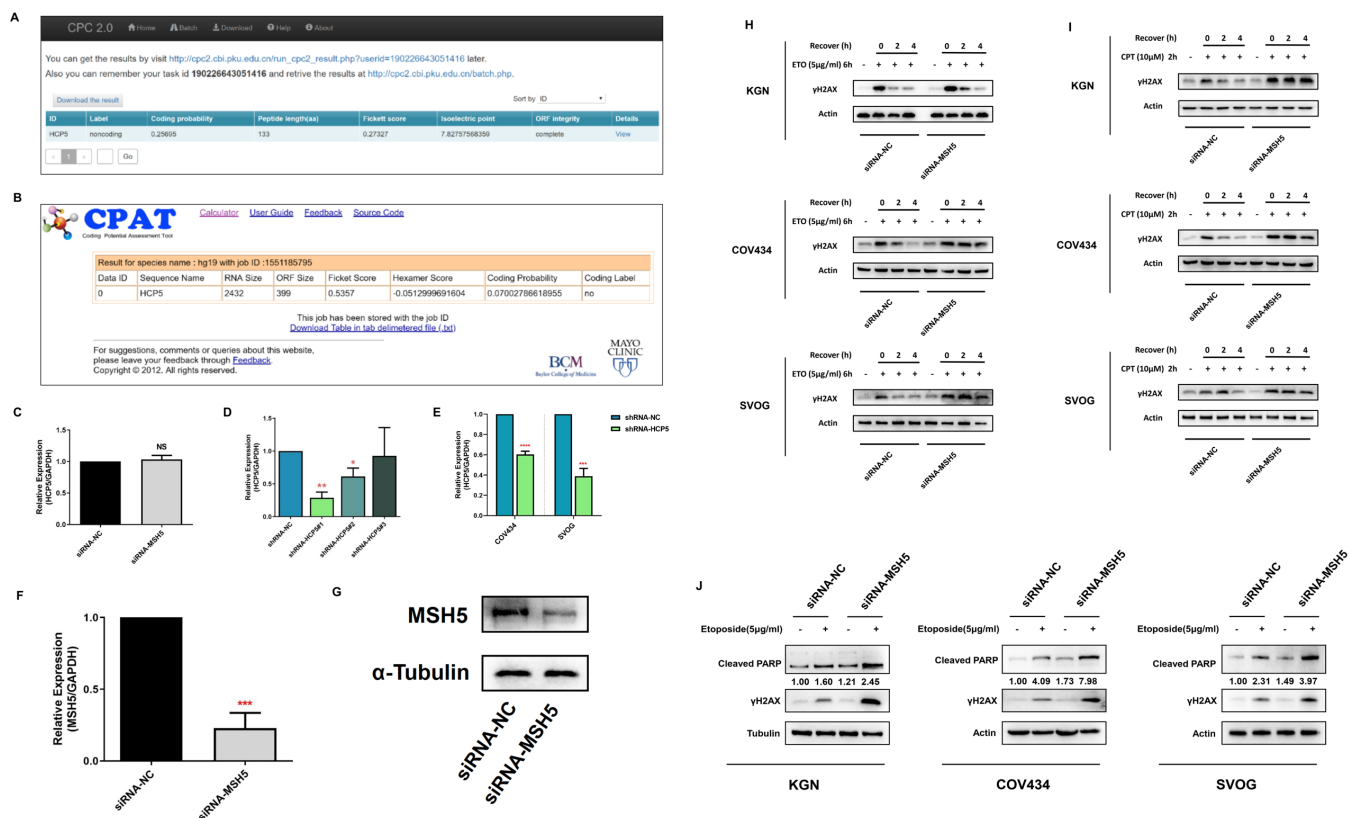

Supplementary Figure S1.

(A) Coding probability of HCP5 was assessed by Coding Potential Calculator (CPC2). (B) Coding probability of HCP5 was assessed by Coding-Potential Assessment Tool (CPAT). (C) The qRT-PCR indicated that HCP5 levels were not affected by siRNA-mediated knockdown of MSH5 in KGN cells. Results are expressed as the mean  $\pm$  SD (n=3). Two-tailed Student's t-test. (D, E) The qRT-PCR detected the expression of HCP5 after knockdown of HCP5 mediated by three specific shRNAs in KGN(D), COV434 and SVOG cells (E). Results are expressed as the mean  $\pm$  SD (n=3). \*P < 0.05, \*\*P < 0.01 and \*\*\*P < 0.001. Two-tailed Student's t-test. (F) The qRT-PCR detected the levels of MSH5 mRNA after knockdown of MSH5 mediated by siRNA. Results are expressed as the mean  $\pm$  SD (n=3). \*\*\*P < 0.001. Two-tailed Student's t-test. (G) Western blot detected the levels of MSH5 protein after knockdown of MSH5 mediated by siRNA. (H) After exposed to ETO for 6 h, the  $\gamma$ H2AX levels were detected by western blot in MSH5-knockdown and negative control KGN, COV434 and SVOG cells. Data shown represent three independent experiments. (I) After exposed to CPT for 2 h, the  $\gamma$ H2AX levels were detected by western blot in MSH5-knockdown and negative control KGN, COV434 and SVOG cells. Data shown represent three independent experiments. (J) Silencing of MSH5 enhanced the cleavage of PARP and formation of  $\gamma$ H2AX caused by treatment with Etoposide in KGN, COV434 and SVOG cells. Data shown represent three independent experiments.

## Supplementary Figure S2

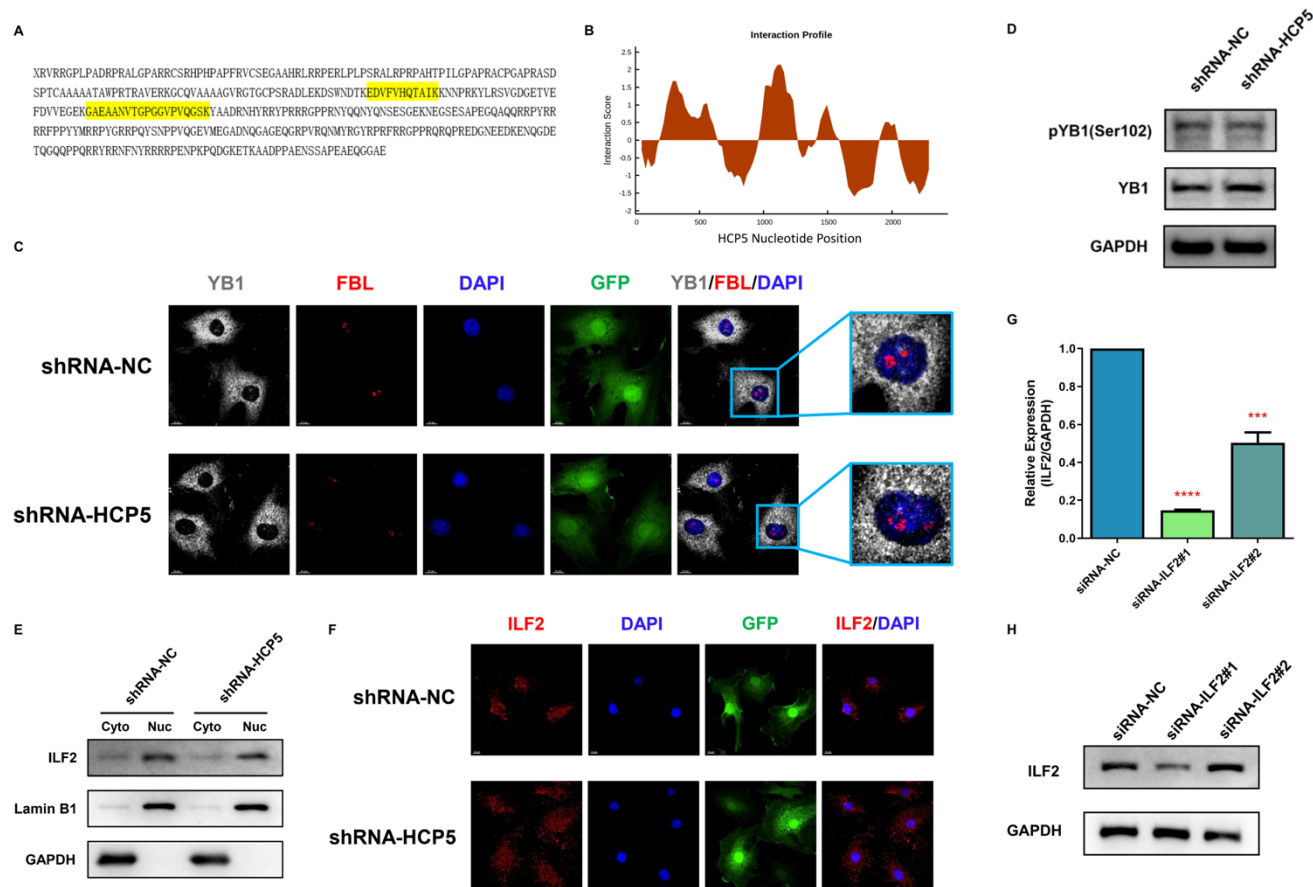

Supplementary Figure S2.

(A) Two HCP5-binding peptides identified by MS were highlighted in the amino acid sequence of YB1 protein. (B) The *catRAPID* fragments module prediction of the interaction profile between HCP5 and YB1 protein. (C) Co-localization of YB1 protein and the nucleolar marker Fibrillarin (FBL) was confirmed by immunofluorescence assay after HCP5 silencing. (D) Western blot detected the phosphorylation levels of YB1 protein at Ser102. (E) Subcellular localization of ILF2 protein was detected by western blot after HCP5 knockdown in KGN cells. Lamin B1 was used as nuclear control. GAPDH was used as cytoplasmic control. (F) Subcellular localization of ILF2 protein was confirmed by immunofluorescence assay after HCP5 silencing. (G) The qRT-PCR detected the expression of ILF2 mRNA after knockdown of ILF2 mediated by two specific siRNAs. Results are expressed as the mean  $\pm$  SD ( $n=3$ ). \*\*\* $P < 0.001$  and \*\*\*\* $P < 0.0001$ . Two-tailed Student's *t*-test. (H) Western blot detected the levels of ILF2 protein after knockdown of ILF2 mediated by two specific siRNAs.
